# Supplementary material for: A Tumor and Immune-Related Micro-RNA Signature Predicts Relapse-Free Survival of Melanoma Patients Treated with Ipilimumab
Source: MDPI journal article supplement (doi:10.3390/ijms24098167), 2023-05-03
Supplement: s1 [file s1]

**Table S2:** miRNA signature target genes identified using miRTarBase

| miRNA signature target genes |               |           |          |         |             |
|------------------------------|---------------|-----------|----------|---------|-------------|
| ADAMTS20                     | DCAF7         | KIF5B     | OAZ2     | SP1     | VGLL4       |
| ADI1                         | DDX3X         | KLHL21    | P2RY1    | SP140L  | VSIG2       |
| ADSS                         | DEPDC1B       | KLHL32    | PARP15   | SPRYD4  | WDR81       |
| AFF2                         | DHCR24        | KPNA2     | PCSK4    | SRD5A1  | WWC2        |
| AGBL5                        | DIAPH2        | KPNA6     | PDE3A    | SSTR3   | XRRA1       |
| AIP                          | DLC1          | KRTAP4-9  | PIGN     | ST13    | YAF2        |
| ALDH9A1                      | DNM2          | LDLR      | PMAIP1   | STAM    | YTHDC1      |
| ANK1                         | DNTTIP2       | LIMCH1    | PNMA3    | STAMBP  | ZNF106      |
| ANKRD36                      | DUSP1         | LIN54     | POGZ     | STARD8  | ZNF385A     |
| AP3B1                        | ECSIT         | LMAN2     | POLDIP2  | STYK1   | ZNF99       |
| ARHGAP21                     | EIF2AK4       | LMBR1     | PPM1A    | SULT1B1 | ZNRF3       |
| ARSJ                         | EIF4A2        | LPP       | PPP6C    | SYAP1   | CRISPLD2    |
| ATP6V1G1                     | EPHA4         | MAGEF1    | PRDM6    | SYNRG   | CYB561A3    |
| AXIN2                        | ERBB2         | MAP1B     | PSD4     | TAS2R30 | ID4         |
| AZIN1                        | F2RL2         | MAPK10    | PTP4A1   | TES     | ILK         |
| B3GALT5                      | FADS1         | MB21D2    | QSOX1    | TET3    | NCKAP1L     |
| B4GALT5                      | FAM208A       | MDM2      | RAB3GAP1 | THOC2   | NLN         |
| BCLAF1                       | FAM89A        | MFSD9     | RAB44    | THSD7A  | SLC35G2     |
| C1orf52                      | FGD4          | MOB1A     | RAN      | TMCO1   | SLC41A2     |
| C6orf48                      | FGFR1OP2      | MRPL10    | RCAN1    | TMEM98  | UBN2        |
| CALM3                        | FRK           | MTMR12    | REST     | TNFAIP1 | UBXN2A      |
| CAND1                        | GDE1          | MTRNR2L10 | RPL10    | TNFSF9  | CREBRF      |
| CANX                         | GDNF          | MTRNR2L11 | RPN2     | TNPO1   | hsa-miR-711 |
| CAPRIN1                      | GLTSCR2       | MTRNR2L3  | RPS24    | TNPO3   | NCAN        |
| CCDC113                      | GOLT1B        | MTRNR2L7  | RPS4Y1   | TNRC6C  | SLC25A37    |
| CCDC93                       | GPR26         | MYL12B    | SAR1A    | TNS1    | UBE2V2      |
| CCNT2                        | GRPEL2        | NBPF1     | SDE2     | TOB1    |             |
| CDH7                         | GXYLT1        | NBPF10    | SEC24A   | TPI1    |             |
| CDK1                         | HIATL1        | NBPF11    | SEPT2    | TRAK1   |             |
| CDKN2B                       | HIST1H2AH     | NBPF12    | SGCD     | TRIM66  |             |
| CEBPB                        | HNRNPA1       | NBPF14    | SH3TC2   | TRIP13  |             |
| CLCN5                        | HOXD1         | NBPF15    | SIKE1    | TTC37   |             |
| CLDND1                       | hsa-miR-22-5p | NBPF20    | SKI      | TXNIP   |             |
| CPA4                         | hsa-miR-641   | NBPF3     | SLC25A33 | UBE2Q1  |             |
